# **Title: An ultrasound absorbing inflorescence zone enhances echo-acoustic contrast of bat-pollinated cactus flowers**

**Authors:** Ralph Simon<sup>1</sup>, Felix Matt<sup>2,3</sup>, Vinicio Santillan<sup>4</sup>, Marco Tschapka<sup>5,6</sup>, Merlin Tuttle<sup>7</sup>  
Wouter Halfwerk<sup>1</sup>

<sup>1</sup>Department of Ecological Science, Vrije Universiteit, Amsterdam, The Netherlands

<sup>2</sup>Estación Científica San Francisco, Loja, Ecuador

<sup>3</sup>Faculty of Geography, Lab for Climatology and Remote Sensing, Philipps-University of Marburg, Germany

<sup>4</sup>Universidad Católica de Cuenca, Cuenca, Ecuador

<sup>5</sup>Institute of Evolutionary Ecology and Conservation Genomics, University of Ulm, Germany

<sup>6</sup>Smithsonian Tropical Research Institute, Ancon, Balboa, Panama

<sup>7</sup>Merlin Tuttle's Bat Conservation, Austin, Texas

**Running title:** ultrasound absorbing inflorescence zones in a bat-pollinated cactus

**Key words:** floral acoustics, echolocation, bat-pollination, chiropterophily, Cactaceae, cephalium, ultrasound absorption

## **Abstract**

1 Flowering plants have evolved an extraordinary variety of signaling traits to attract and  
2 guide their pollinators. Most flowers rely on visual and chemical signals, but some bat-  
3 pollinated plants have evolved reflective surfaces to acoustically guide echolocating bats.  
4 All known echo-acoustic flower signals rely on the same basic acoustic principles of  
5 increased sonar reflectivity. Here we reveal a novel mechanism through which plants  
6 acoustically communicate with bats, a principle that relies on increased absorption of the  
7 area surrounding the target flower, thereby enhancing echo-acoustic contrast. In a bat-  
8 pollinated columnar cactus (*Espostoa frutescens*) from the Ecuadorian Andes we found a  
9 hairy inflorescence zone, a so called lateral cephalium. Flowers of this cactus solely  
10 emerge out of this hairy zone. We measured the ultrasound echoes of the hairy zones, the  
11 flowers and unspecialized column surfaces with a biomimetic sonar head and recorded  
12 echolocation calls of approaching bats. We found that the hairy inflorescence zones act as  
13 strong ultrasound absorber, attenuating the sound by -14 dB compared to other parts of  
14 the column. The absorption was highest around the echolocation call frequencies of  
15 approaching bats. Our results indicate that, instead of making flowers more reflective,  
16 plants can also evolve specific structures to attenuate the background echo, thereby  
17 enhancing the acoustic contrast with the target. Similar sound absorbing mechanisms  
18 may be found in other species that interact with bats across a wide range of ecological  
19 contexts.

## 20 Introduction

21 Flowering plants rely on a wide variety of communication strategies to attract their  
22 pollinators. Conspicuous visual flower signals are in particular useful to guide receivers,  
23 as they are easy to locate and the use of colours makes flowers stand out against the  
24 vegetation background [1, 2]. Nocturnally flowering bat-pollinated plants however are  
25 limited in the use of visual signals to attract their pollinators. Several plants have  
26 therefore independently evolved echo-reflective structures to acoustically guide these  
27 nocturnal pollinators [3-6]. Echo-acoustic signalling plants all use concave shapes with  
28 either triple mirror, bell- or dish-like structures. These concave shaped structures share  
29 the same basic acoustic principle of focusing returning echoes to an approaching bat,  
30 thereby increasing the range over which they can be detected. Some flower signals use  
31 additional spectral-temporal signatures increasing conspicuousness [4]. Reflective  
32 structures also evolved in bat-plant-interactions even outside a pollination context. The  
33 carnivorous pitcher plant *Nepenthes hemsleyana*, for example, has a highly reflective  
34 prolonged pitcher backwall to advertise their pitcher-leaves as roosts [6]. Bats roosting  
35 inside the pitcher provide additional nitrogen intake through their droppings[7].

36 Here we assess an evolutionary novel adaptation that enhances acoustic communication  
37 between plants and pollinating bats. Interestingly, some cacti species exhibit at a certain  
38 age inflorescence zones that are particularly hairy, the so-called *cephalium*. There are  
39 several different morphologies of cacti described as cephalia, and we refer here to what  
40 is described as a lateral cephalium by Mauseth (2006) [8]. Several functions of these  
41 *cephalia* zones, have been proposed. The hairy structure may shield buds from UV  
42 radiation at high altitudes, or protect against nectar robbers and herbivores [8-10]. Here  
43 we test a hypothesis by von Helversen et al. (2003) [5], which states that such hairy zones  
44 may have been co-opted to serve in bat-pollinated cacti as sound-absorbing structures  
45 that support detection and localization of sound-reflecting flowers by pollinating bats.

46 Using a bat-mimetic sonar-head we carried out ensonification experiments with different  
47 parts of the cactus *Espositoa frutescens* [5] from the Andes. Specifically, we ensonified the  
48 cactus' column, flowers as well as the hairy *cephalium* zone. Additionally, we recorded the  
49 echolocation calls of its main pollinator, the nectar-feeding bat *Anoura geoffroyi*  
50 (Phyllostomidae) and assessed whether the cephalium was especially absorbent in the  
51 ultrasonic frequency range of the calls.

## 52 **Material and Methods**

53 We studied *Espositoa frutescens* and its pollinator, *Anoura geoffroyi*. The study was carried  
54 out in a dry valley of the Ecuadorian Andes, close to the city Oña in the province of Azuay.  
55 As it was not possible to conduct the echo measurements in the field – the cacti are  
56 growing in rocky and steep habitat - we cut the columns and conducted the measurements  
57 indoors at a nearby farm. All experiments were approved by the local authorities  
58 (Ministeria del Ambiente, Cuenca, Ecuador, autorizacion para investigación científica N.  
59 035-DPA-MA-2012). A specimen is deposited at Herbario Azuay (Cuenca, Ecuador) with  
60 the number HA 7814.

61 To measure the reflectance of the different parts of the cacti we mounted the columns on  
62 tripods and used a custom-built biomimetic sonar head to ensonify them. The sonar head  
63 consisted of a 1/4" condenser microphone (40BF; preamplifier 26AB; power module  
64 12AA; G.R.A.S. Sound & Vibration, Holte, Denmark) and a custom-made EMFi (Electro  
65 Mechanical Film) loudspeaker (sound pressure levels at 1 m distance: 92 dB ± 8 dB,  
66 frequency range: 30-160 kHz; Department of Sensor Technology, University of Erlangen-  
67 Nuremberg, Erlangen, Germany). The speaker and the microphone were embedded in an  
68 aluminium body and placed next to each other as they would be located on the head of a  
69 bat. We ensonified cacti from a distance of 15 cm with a continuously replayed MLS Signal  
70 (Maximum Length Sequence) of 16383 samples length. We recorded the reflected sound  
71 and obtained the impulse responses (IR) by deconvolution of the reflected echo and the  
72 original MLS [5]. The spectral target strength was obtained by windowing the IRs (1024  
73 samples) and calculating the power spectral density (PSD). To obtain spectral target  
74 strength (TS), independent of the frequency response of the loudspeaker, we calculated  
75 the difference between PSD from the reflector and the PSD of an acrylic glass plate  
76 oriented perpendicular to the direction of sound propagation at exactly the same position  
77 as the column/flower (For more information on the setup see also [4, 5, 11]).

78 Using our ensonification setup we measured the acoustic properties of six freshly cut  
79 columns of *E. frutescens*, focusing on the hairy cephalium zone and the unspecialized parts  
80 (backside) of the column. For both measurements we scanned the columns by moving the  
81 sonarhead upwards along its vertical axis and made 10 measurements at different heights  
82 of the column. We also measured the reflectance of six isolated flowers, which were

83 mounted on a stepping motor. We rotated the flower in 3° steps and measured 20 echoes  
84 around the opening (0°) of the flowers from -30° to 30°.

85 To understand how the echo of a flower would be received if it would grow on an  
86 unspecialized part of the column we manipulated one column. We first scanned the hairy  
87 cephalium with an open flower by moving the sonar head upwards along the vertical axis  
88 of the column over an area of 30 cm. The flower was located central on this area and we  
89 measured in 1 cm steps. After the measurements we cut out the flower from the  
90 cephalium and fixed it on the hairless backside of the column (Fig. 2B). For this  
91 experimentally manipulated column we made the same detailed vertical scan (30 cm, 1  
92 cm steps).

93 We also recorded echolocation calls of two male Geoffroy's tailless bats (*Anoura geoffroyi*)  
94 approaching an *Espostoa* column with an open flower. The microphone (1/4" condenser  
95 microphone 40BF; preamplifier 26AB; power module 12AA; G.R.A.S. Sound & Vibration,  
96 Holte, Denmark) was placed next to the flower and we recorded with a sampling rate of  
97 500 ks/s. We obtained 45 manually triggered recordings, each with a length of 2 s, during  
98 the approaches of the bats. To ensure a good signal-to-noise-ratio for the call analysis we  
99 selected 21 approach sequences where at least two calls had an amplitude of more than  
100 6% full scale. We analysed the calls using the program Avisoft-SASLab Pro (Avisoft  
101 Bioacoustics, Glienicke, Germany).

102 We tested for significant effects of plant structure on echo-acoustic target strength using  
103 the lmer package in R (version 3.5.3). We constructed linear mixed models and checked  
104 model assumptions by visual inspection of the residuals. Target strength was averaged  
105 over the 10 measurements per plant individual and structure and modelled as dependent  
106 variable. Plant structure (column, flower or cephalium) was added as fixed factor and  
107 plant individual as a random intercept term. For the different frequency ranges we  
108 modelled the interaction between plant part and frequency band. We tested for  
109 significance of main effect of plant structure on target strength and for significance of the  
110 interaction between structure and frequency band by comparing models with and  
111 without terms using likelihood ratio tests.

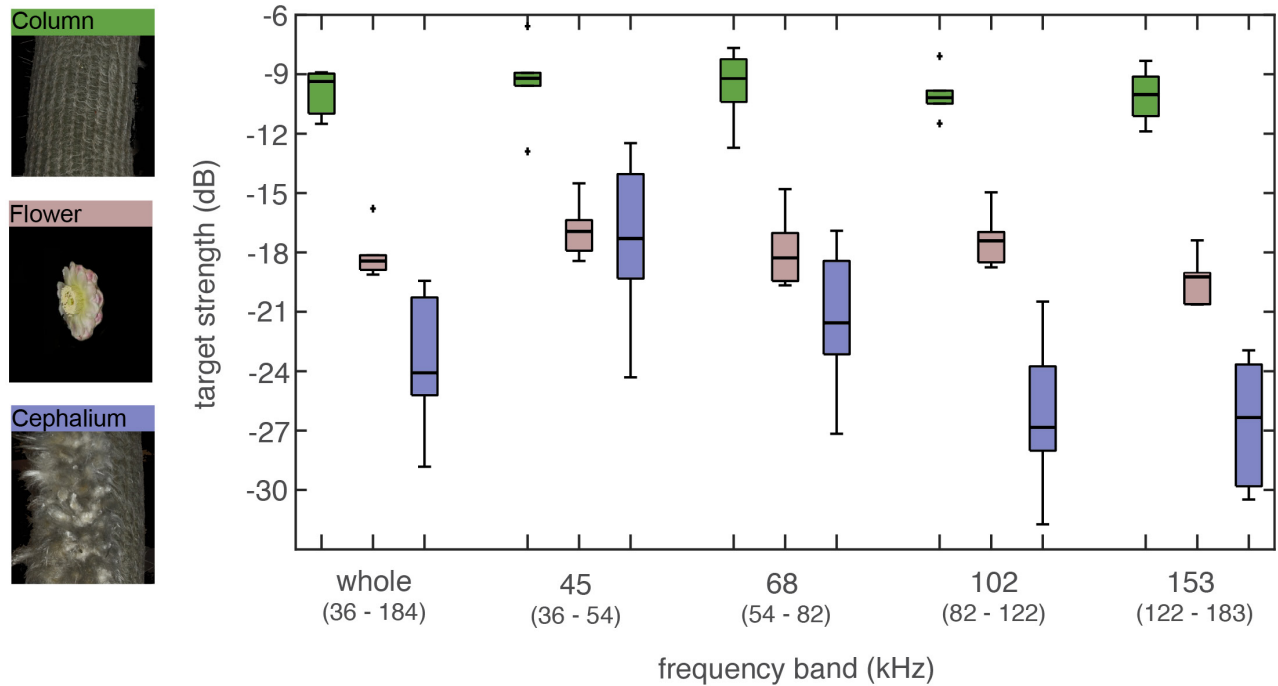

**Figure 1.** Spectral target strength (TS) of different morphological structures of *Espostoa frutescens* for different frequency bands. The spectral target strength was obtained from ensonification measurements at a distance of 15cm. We measured unspecialized parts of the cactus column (green boxplots; n = 6 columns, 10 measurements per column), isolated flowers (rose boxplots; n = 6 columns, 20 measurements per flower from different angles) and the hairy cephalium zone (purple boxplots; n = 6 columns, 10 measurements per column).

## 112 Results

113 We found a significant effect of plant structure on overall target strength (LMM, n = 18  
114 plant structures, n = 180 measurements, d.f. = 2, X<sup>2</sup> = 39.31, P < 0.001). Furthermore,  
115 target strength depended on the interaction between frequency range and plant structure  
116 (LMM, d.f. = 8, X<sup>2</sup> = 37.51, P < 0.001). Overall, the plain column surface of *E. frutescens*  
117 reflected the strongest echoes. We measured a high target strength (average TS -9.8 dB)  
118 for these unspecialized surfaces of the cactus across a wide range of frequencies (Fig. 1).  
119 The overall average TS of the flower was much lower compared to the column (-18.1 dB)  
120 but also remained similar across all measured frequency bands (Fig 1). The hairy  
121 cephalium zone on the other hand showed differences in TS for the different frequency  
122 bands (Fig 1). For the lower frequency band (45 kHz) the TS was about the same level as  
123 the flower (-17.5 dB) but for higher frequency bands it was much lower, down to -26.3 dB  
124 for the 102 kHz frequency band. Overall, the cephalium zone had an average target



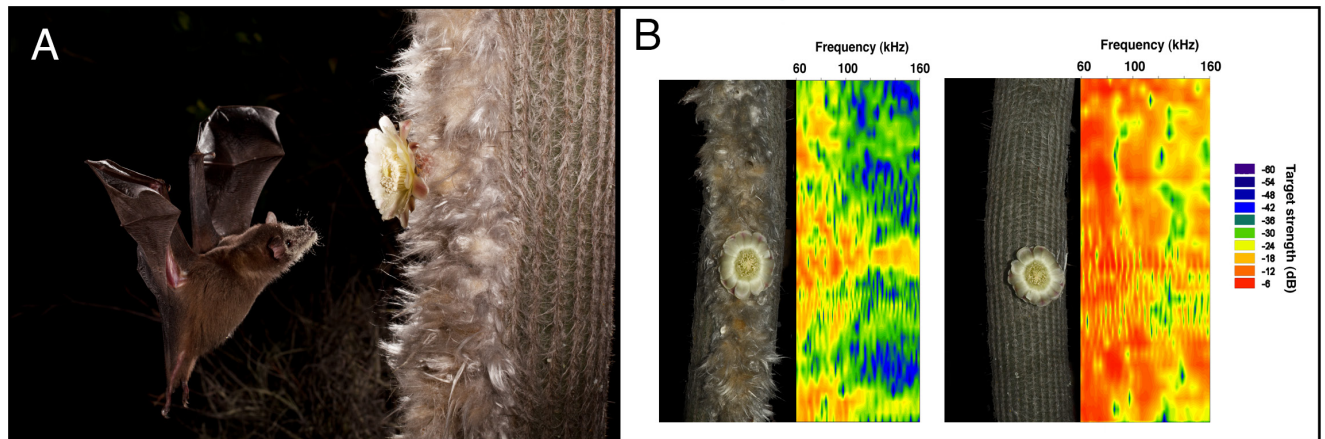

**Figure 2.** Nectar-feeding bat approaching a flower and echo fingerprints of different cactus surfaces with flowers. **(A)** Image of a Geoffroy's tailless bat (*Anoura geoffroy*) approaching a flower of *Espostoa frutescens*, which is embedded in the hairy cephalium zone (photo credit: Merlin Tuttle's Bat Conservation). **(B)** Echo fingerprints of acoustic scans along the cactus column. The left column is a natural column with cephalium and flower, for the right measurement we experimentally manipulated the column. The flower was cut out of the hairy zone and fixed on an unspecialized part of the column. The intensity (spectral target strength in dB) of the echo is given in colour gradation (red indicates high intensities, blue low intensities).

125 strength of -23.7 dB, which is around 14 dB lower than the unspecialized parts of the  
126 column.

127 A qualitative analysis of the echo-acoustic fingerprint of specialized versus unspecialized  
128 parts of the column revealed more detailed insight into the effect of the background on  
129 detectability of flower targets (Fig 2B). The unspecialized column reflects high TS echoes  
130 for almost the entire bandwidth, which are only sometimes interrupted by some  
131 frequency notches. The specialized cephalium side of the column reflects much less sound  
132 energy, especially for frequencies above 90 kHz. When scanning the column at the  
133 position of the flower, the unmanipulated flower stands out from the less-reflecting  
134 background, in particular at frequencies above 90 kHz. When we placed a flower on the  
135 unspecialized part of the column the flower echoes almost completely disappear within  
136 the loud background echoes, although there might be some additional interference  
137 patterns affecting the TS.

138 In total we analysed 279 echolocation calls of two individuals of *A. geoffroyi*, see Fig. 3 for  
139 an example of an echolocation call sequence during an approach to an *E. frutescens*

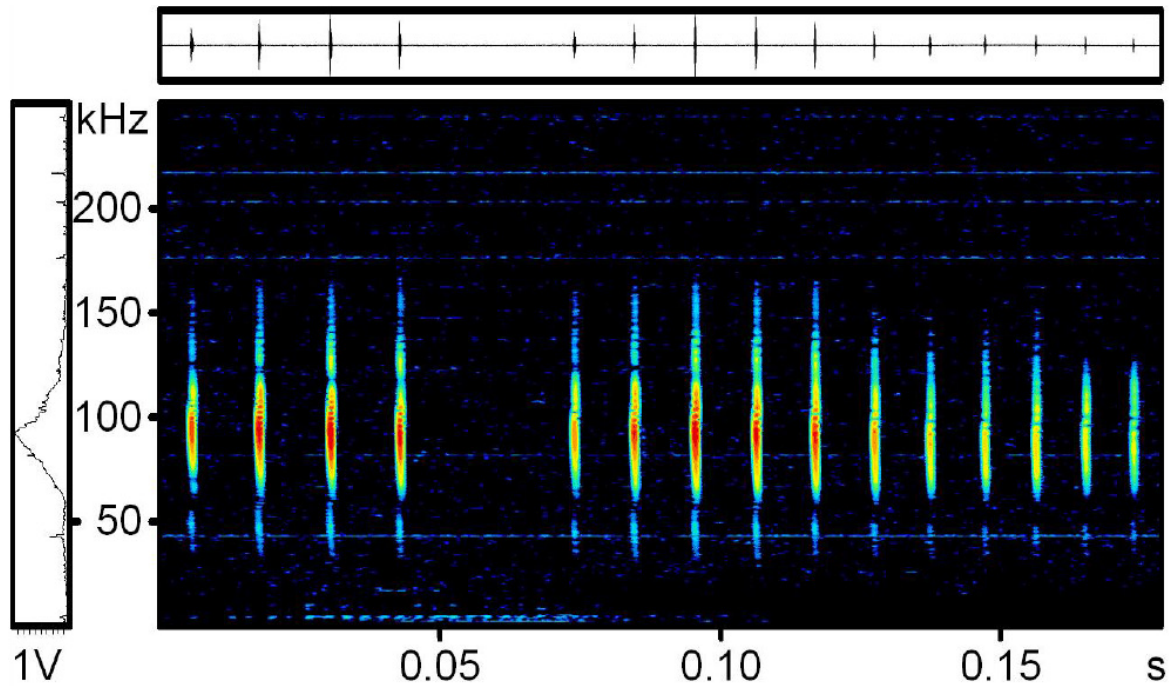

**Figure 3.** Typical series of calls of a Geoffroy's tailless bat (*Anoura geoffroyi*) while approaching an *Espostoa frutescens* flower. The microphone (1/4" G.R.A.S. free field microphone) was placed next to the flower.

140 flower. The calls were short, having a duration of only  $0.47 \text{ ms} \pm 0.18 \text{ ms}$  (mean  $\pm$  SD)  
141 and they were step frequency modulated starting at  $132.7 \text{ kHz} \pm 8.1 \text{ kHz}$  and ending at  
142  $59.8 \text{ kHz} \pm 10.0 \text{ kHz}$ . The peak frequency of the calls was at  $92.5 \text{ kHz} \pm 4.4 \text{ kHz}$ , which falls  
143 into the frequency band where sound absorption of the cephalium was highest.

#### 144 Discussion

145 Our ensoufication experiments revealed distinct and frequency-dependent differences in  
146 echo-acoustic reflectance of different cacti parts. We found that the plain column of  
147 *Espostoa* acts as a strong reflecting surface as it is cylindrical, providing reflective surfaces  
148 from all directions, and also because the surface has ridges, which may additionally act as  
149 small retroreflectors. The flowers of *Espostoa* reflect much less energy compared to the  
150 column, mainly due to the facts that the reflecting surface is smaller and that flowers have  
151 a lot of anthers, which scatter the sound energy. The specialized cephalium surrounding  
152 the flowers reflected the least energy, in particular in the echolocation call frequency  
153 range of the plant's main pollinator, *A. geoffroyi*. These results strongly suggest that the  
154 cephalium of *Espostoa* functions as a sound-absorbing structure and thus enhances the

155 echo-acoustic contrast between the flower and the vegetative part of the plant for an  
156 approaching bat. While scanning cacti columns for flowers along the cephalium the bats  
157 will receive faint echoes unless their call hits a flower, which increases the echo response  
158 by around 10 dB. In contrast, flowers growing on the unspecialized parts of the column  
159 would be much more difficult to recognize in front of the highly reflective background.  
160 Bats might be able to pick up on the interference patterns caused by the flowers, however,  
161 this would require much more processing than a salient flower echo in front of an  
162 absorbing surface.

163 Such a simple yet efficient mechanism of dampening the background of the flowers thus  
164 may help the bats to save on foraging time – nectar feeding bats have to visit or revisit  
165 several hundred flowers each night to cover their nightly energy expenditure – and thus  
166 increase foraging efficiency [12]. The plant on the other hand will benefit from a higher  
167 cross pollination rate - bats are very efficient pollinators that carry a lot of pollen in their  
168 fur (see Fig 2A) and have a huge home range so they can pollinate plants growing far apart  
169 [13].

170 The absorption of the *cephalium* is most efficient for the 102 kHz frequency band (82 kHz  
171 – 122 kHz), which translates to a wavelength of around 3.4 mm (4.2 mm – 2.8 mm). The  
172 microstructure of the *cephalium* apparently favours absorption of sound around this  
173 wavelength, while larger wavelengths (e.g., 7.6 mm for the 45 kHz band) are around 10  
174 dB less attenuated. The hairs are much smaller in diameter than the wavelengths of sound  
175 they absorb best and therefore probably do not scatter the incoming sound waves. An  
176 alternative explanation could be that the hairs create a layer of air with different  
177 temperature that reflects the sounds in a frequency-dependent manner.

178 As other species of *Espostoa* show the same hairy cephalium zone this floral acoustic  
179 adaptation might not only be limited to this species and even other genera have similar  
180 hairy cephalium zones e.g. *Microanthocereus* [8]. Interestingly, bird pollinated species of  
181 the genus *Microanthocereus* have also cephalium zones, however the fur is much less  
182 dense. We argue that cephalium-like structures originally evolved for protection of floral  
183 structures, but was co-opted at some point in time to serve an additional or new  
184 functional role in pollinator attraction. Once co-opted, the cephalium of bat-pollinated  
185 flowers got optimized for this new function through selection by the echolocating bat  
186 pollinators.



187 Our study reveals that bat-pollinated flowers can also rely on absorption in addition to  
188 reflectance as an acoustic adaptation towards their pollinators. Echoacoustic absorption  
189 likely plays a much larger role across a wide range of ecological contexts than so far has  
190 been appreciated. Sound absorbent structures have already been described for moth  
191 scales [14] as well as for thoracic moth fur [15]. Whether absorption has adapted in the  
192 context of predator-prey arms races remains however to be tested, ideally in a  
193 comparative phylogenetic framework.

## 194 **Acknowledgements**

195 We are very grateful to Otto von Helversen who initiated this study before his all to early  
196 death. We greatly acknowledge the help from Nery Fabian Chamorro Rodas during  
197 collection and the measurements of the cacti and the help from all people from Susudel  
198 Granja Organica. We thank the Herbario Azuay (Patent: FLR.S-004-2019) for the  
199 identification and assistance with the *E. frutescens* specimen.

## **References**

- [1] Spaethe, J., Tautz, J. & Chittka, L. 2001 Visual constraints in foraging bumblebees: flower size and color affect search time and flight behavior. *Proc. Natl. Acad. Sci. U.S.A.* **98**, 3898-3903.
- [2] Forrest, J. & Thomson, J.D. 2009 Background complexity affects colour preference in bumblebees. *Naturwissenschaften* **96**, 921-925.
- [3] von Helversen, D. & von Helversen, O. 1999 Acoustic guide in bat-pollinated flower. *Nature* **398**, 759-760.
- [4] Simon, R., Holderied, M.W., Koch, C.U. & von Helversen, O. 2011 Floral acoustics: conspicuous echoes of a dish-shaped leaf attract bat pollinators. *Science* **333**, 631-633.
- [5] von Helversen, D., Holderied, M.W. & von Helversen, O. 2003 Echoes of bat-pollinated bell-shaped flowers: conspicuous for nectar-feeding bats? *J. Exp. Biol.* **206**, 1025-1034.
- [6] Schöner, Michael G., Schöner, Caroline R., Simon, R., Grafe, T.U., Puechmaille, Sébastien J., Ji, Liaw L. & Kerth, G. 2015 Bats Are Acoustically Attracted to Mutualistic Carnivorous Plants. *Current Biology* **25**, 1911-1916. (doi:10.1016/j.cub.2015.05.054).
- [7] Grafe, T.U., Schöner, C.R., Kerth, G., Junaidi, A. & Schöner, M.G. 2011 A novel resource-service mutualism between bats and pitcher plants. *Biology Letters* **7**, 436-439.
- [8] Mauseth, J. 2006 Structure-function relationships in highly modified shoots of Cactaceae. *Annals of Botany* **98**, 901-926.
- [9] Buxbaum, F. 1961 Die Entwicklungslinien der Tribus Pachycereae F. Buxb. (Cactaceae- Cereoideae). *Botanische Studien* **12**.
- [10] Martorell, C., Vega, E. & Ezcurra, E. 2006 Morphological consequences of the trade-off between growth and reproduction in a columnar cactus (*Lophocereus schottii*). *Plant Ecology* **183**, 125-131.
- [11] Simon, R., Holderied, M.W. & von Helversen, O. 2006 Size discrimination of hollow hemispheres by echolocation in a nectar feeding bat. *J. Exp. Biol.* **209**, 3599-3609.

[12] Winter, Y. & von Helversen, O. 2005 Bats as pollinators: foraging energetics and floral adaptations. In *Cognitive Ecology of Pollination: Animal Behaviour and Floral Evolution* (eds. L. Chittka & J. Thomson), pp. 148-170. Cambridge, Cambridge University Press.

[13] Von Helversen, O. & Winter, Y. 2003 Glossophagine bats and their flowers: costs and benefits for plants and pollinators. In *Bat ecology* (eds. T.H. Kunz & M.B. Fenton), pp. 346-397. Chicago, Illinois, The University of Chicago Press.

[14] Shen, Z., Neil, T.R., Robert, D., Drinkwater, B.W. & Holderied, M.W. 2018 Biomechanics of a moth scale at ultrasonic frequencies. *Proceedings of the National Academy of Sciences* **115**, 12200-12205.

[15] Neil, T.R., Shen, Z., Drinkwater, B.W., Robert, D. & Holderied, M.W. 2018 Stealthy moths avoid bats with acoustic camouflage. *The Journal of the Acoustical Society of America* **144**, 1742-1742.

### Supplementary Figure

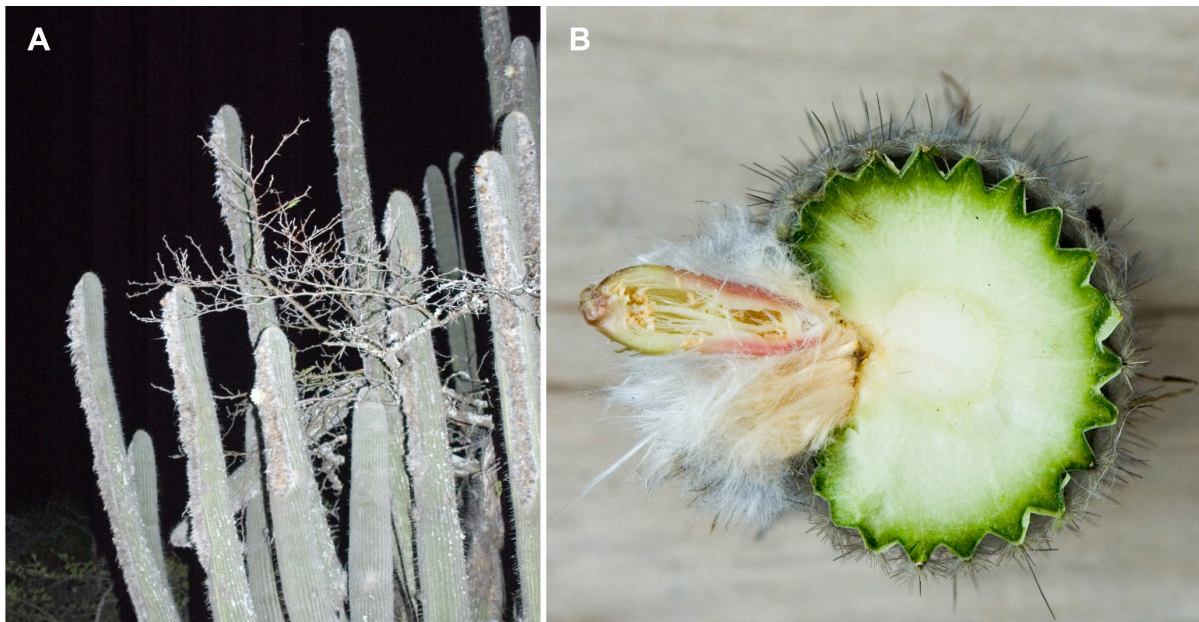

**Figure S1.** (A) Habitus of an *Espostoa frutescens* plant and (B) cross section of a column with the hairy cephalium and a closed flower.
